# Supplementary material for: COVID-19-related dynamic coagulation disturbances and anticoagulation strategies using conventional D-dimer and point-of-care Sonoclot tests: a prospective cohort study
Source: HighWire-hosted journal article supplement (doi:10.1136/bmjopen-2021-051971), 2022-05-01
Supplement: bmjopen-2021-051971supp001_data_supplement.pdf [file bmjopen-2021-051971supp001_data_supplement.pdf]

## Supplementary File 1: Hospital Triage Areas for COVID-19 and clinical algorithm for management of COVID-19 pneumonia

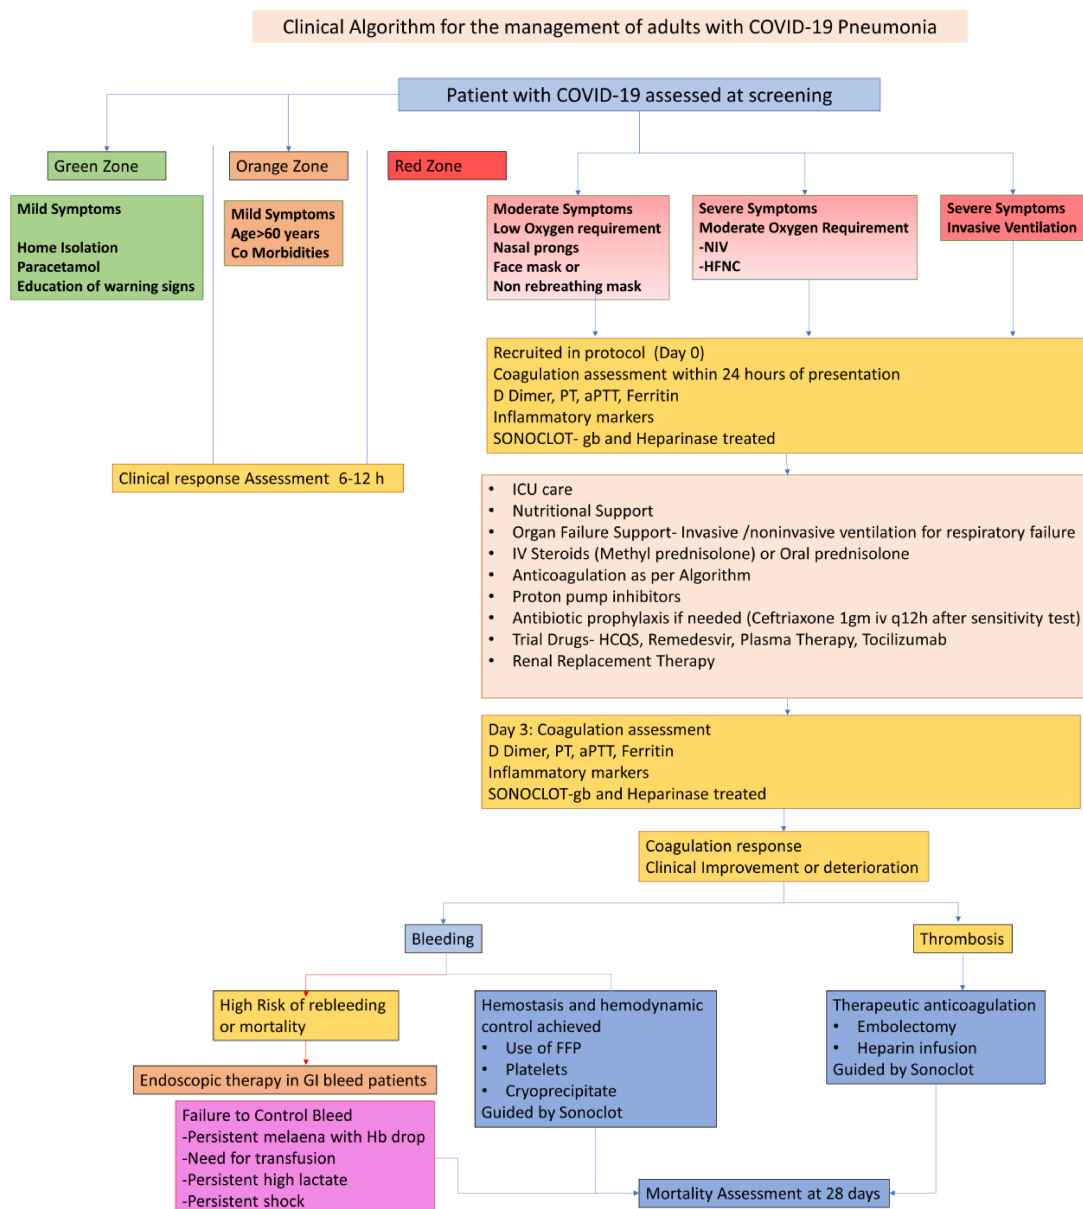

**Supplementary File 2: Anticoagulation protocol at our centre based on conventional and POC global coagulation tests.**

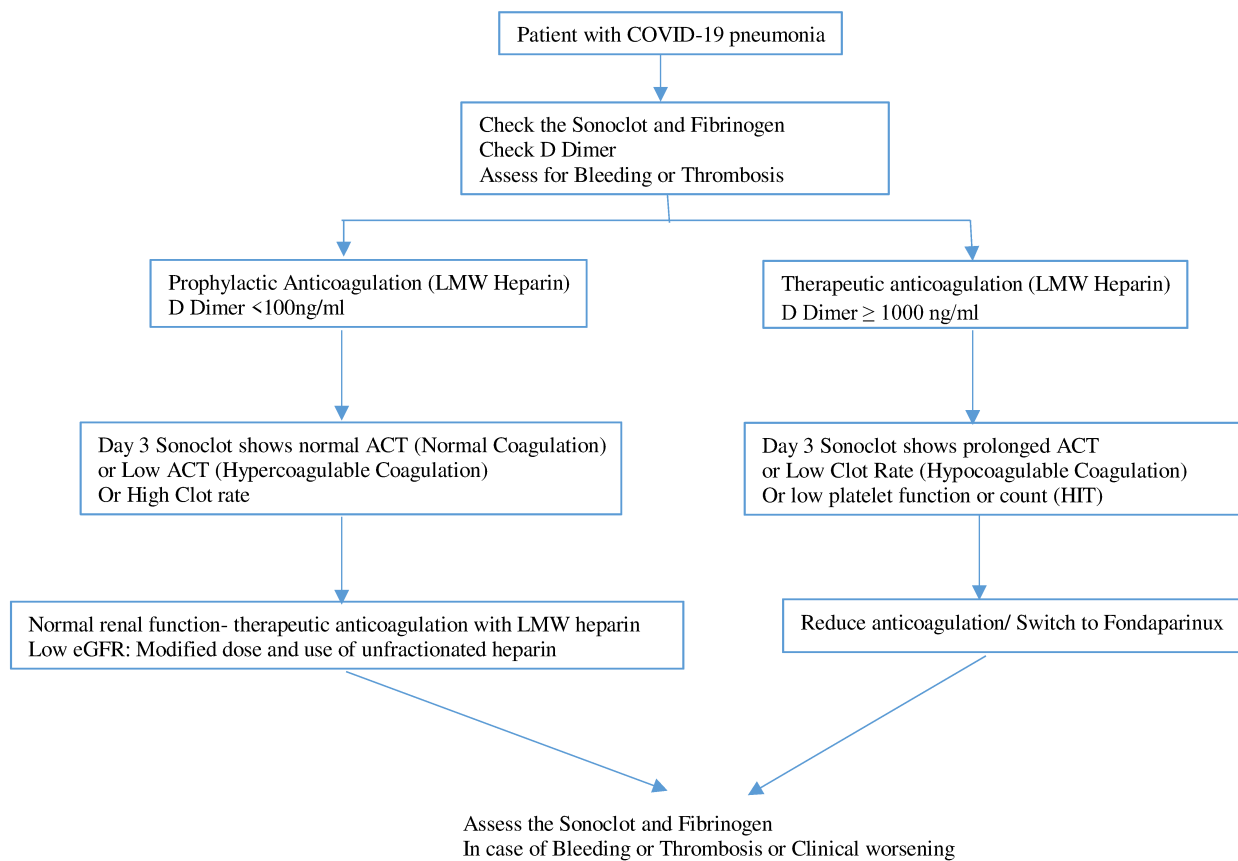

**Supplementary File 3: Baseline characteristics, co-morbidities, and treatment details of the admitted patients with COVID-19.**

| Parameter                            | Total Patients (N=74) | Low flow Oxygen Group 1 (n=11) | High flow Oxygen Group 2 (n=34) | Invasive Ventilation Group 3 (n=29) | P value 1 vs. 2 | P value 1 vs 3 |
|--------------------------------------|-----------------------|--------------------------------|---------------------------------|-------------------------------------|-----------------|----------------|
| <b>Comorbidities</b>                 |                       |                                |                                 |                                     |                 |                |
| Hypothyroidism                       | 13(17.6)              | 0                              | 7(20.6)                         | 6(20.7)                             | 0.101           | 0.102          |
| COPD                                 | 1(1.4)                | 0                              | 0                               | 1(3.4)                              | -               | 0.725          |
| Asthma                               | 1(1.4)                | 0                              | 0                               | 1(3.4)                              | -               | 0.725          |
| Obesity                              | 27(36.48)             | 2(18.2)                        | 5(14.7)                         | 10(34.5)                            | 0.555           | 0.315          |
| <b>Treatment given in each group</b> |                       |                                |                                 |                                     |                 |                |
| Tocilizumab                          | 32(43)                | 5(15.6)                        | 17(53.1)                        | 10(31.2)                            | 0.534           | 0.522          |
| Remdesivir                           | 23(31)                | 3(27.3)                        | 7(20.6)                         | 13(44.8)                            | 0.465           | 0.312          |
| HCQS                                 | 16(22)                | 3(27.3)                        | 11(33.3)                        | 2(6.9)                              | 0.709           | 0.117          |
| Antibiotics                          | 72(97)                | 10(90.9)                       | 33(97.1)                        | 29(100)                             | 0.390           | 0.100          |
| Antifungals                          | 27(36)                | 0                              | 12(35.3)                        | 15(51.7)                            | 0.021           | 0.003          |

|                                              |        |         |           |         |       |       |
|----------------------------------------------|--------|---------|-----------|---------|-------|-------|
| Immuvac<br>(mycobacterium<br>indicus pranii) | 31(42) | 6(54.5) | 19(55.9)  | 6(20.6) | 0.938 | 0.866 |
| Plasma therapy                               | 2(3)   | 0       | 1(3)      | 1(3)    | -     |       |
| Steroid duration(days)                       | 6(0-7) | 4(3-5)  | 1(0-5.75) | 5(0-7)  | 0.059 | 0.873 |

Abbreviations: COPD, chronic obstructive pulmonary disease; HCQS, hydroxychloroquine

#### Supplementary File 4: Predictors of Mortality using Cox Proportional Hazards Analysis

| Univariate Analysis |                      |         | Multivariate Analysis |         |
|---------------------|----------------------|---------|-----------------------|---------|
| Covariate           | HR (95% CI)          | P value | HR (95% CI)           | P value |
| CRP                 | 1.007 (1.005- 1.016) | 0.003   | 1.040 (1.020-1.090)   | 0.014   |
| PF                  | 0.540 (0.291-0.901)  | 0.429   | 0.901 (0.702-1.100)   | 0.045   |
| HLE                 | 1.020 (1.007-1.034)  | 0.002   | 1.010 (1.006-1.030)   | 0.025   |
| PF Ratio            | 0.989 (0.979- 0.999) | 0.038   |                       |         |
| Ferritin            | 1.001 (1.000- 1.010) | 0.037   |                       |         |
| NLR                 | 1.027 (1.007- 1.047) | 0.009   |                       |         |
| D-Dimer             | 1.000 (1.000- 1.000) | 0.027   |                       |         |
| LDH                 | 1.003 (1.000- 1.000) | 0.021   |                       |         |
| Bilirubin           | 1.147 (1.010- 1.303) | 0.035   |                       |         |
| ACT                 | 1.012(1.004- 1.020)  | 0.005   |                       |         |
| d1hACT              | 1.033 (1.013- 1.054) | 0.001   |                       |         |
| d1hCR               | 0.956 (0.908- 1.006) | 0.081   |                       |         |
| d1h Peak amplitude  | 0.960 (0.920- 1.002) | 0.062   |                       |         |
| D1gbACT             | 1.022 (1.011- 1.033) | 0.000   |                       |         |
| D1gb Peak-Amplitude | 0.948 (0.898-1.000)  | 0.051   |                       |         |

Abbreviations: ACT, activated clotting time; CRP, C Reactive Protein; CR, clot rate; LDH, lactate dehydrogenase; PF, platelet function; HLE, heparin like effect; NLR, neutrophil lymphocyte ratio; hACT,

heparinase treated; hCR, heparinase treated CR; hPF, heparinase treated platelet function; PF Ratio, PaO<sub>2</sub>/ FiO<sub>2</sub> ratio;

### Supplementary File 5: Predictors for mortality in COVID 19 patients based on Receiver Operating Characteristics (ROC) analysis

| Parameter   | Cut off value  | AUC   | Sensitivity | Specificity | P value |
|-------------|----------------|-------|-------------|-------------|---------|
| CRP         | 96.7 mg/l      | 0.767 | 87.5        | 69          | 0.001   |
| Ferritin    | 587 ng/ml      | 0.690 | 75          | 61          | 0.021   |
| LDH         | 405 U/L        | 0.700 | 75          | 70          | 0.015   |
| CR          | 27.5 units/min | 0.761 | 66.7        | 87          | 0.012   |
| ACT         | 131 seconds    | 0.744 | 60          | 80          | 0.021   |
| D1hPeak-amp | 72.5 units     | 0.736 | 81.8        | 65          | 0.029   |
| D1gbACT     | 158 seconds    | 0.893 | 91.7        | 79          | 0.001   |
| D1gbCR      | 27 units/min   | 0.730 | 63.7        | 79          | 0.027   |
| gbPA        | 67.5 units     | 0.746 | 72.7        | 73          | 0.023   |

*Abbreviations: CRP, C Reactive Protein; ACT – Activated Clotting Time, CR – Clot Rate, PF – Platelet Function; PA, peak amplitude; LDH, lactate dehydrogenase.*
